# Supplementary material for: Facile fabrication of gas sensors based on molybdenum disulfide nanosheets and carbon nanotubes by self-assembly
Source: Royal Society of Chemistry journal article supplement (doi:10.1039/d3ra01183f), 2023-01-01
Supplement: d3ra01183f1.pdf [file d3ra01183f1.pdf]

## Supporting Information

### Supporting Information for

## Facile fabrication of gas sensors based on molybdenum disulfide nanosheets and carbon nanotubes by self-assembly

Hyejin Rhyu<sup>a,c</sup>, Seonjeong Lee<sup>a</sup>, Myunghyun Kang<sup>b</sup>, Daeho Yoon<sup>c</sup>, Wooseok Song<sup>a</sup>, Sun Sook Lee<sup>a</sup>, Jongsun Lim<sup>a</sup>, Sung Myung<sup>a,\*</sup>

a. Thin Film Materials Research Center, Korea Research Institute of Chemical Technology (KRICT), 141 Gajeong-ro, Yuseong-gu Daejeon 34114, Republic of Korea

b. Advanced Materials Division, Korea Research Institute of Chemical Technology (KRICT), 141 Gajeong-ro, Yuseong-gu Daejeon 34114, Republic of Korea

c. Department of Advanced Material Science and Engineering, Sungkyunkwan University, Suwon 16419, Republic of Korea

| Sensing material           | Method                    | LOD     | Operation temperature | Ref.      |
|----------------------------|---------------------------|---------|-----------------------|-----------|
| MoS <sub>2</sub> /rGO      | Sonication                | 8 ppm   | 40 °C                 | [1]       |
| MoS <sub>2</sub> /graphene | Chemical vapor deposition | 0.2 ppm | RT                    | [2]       |
| MoS <sub>2</sub> /SWCNT    | Sonication                | 50 ppb  | RT                    | This work |

**Table S1.** NO<sub>2</sub> gas sensing properties for MoS<sub>2</sub> and graphene hybrid based gas sensors

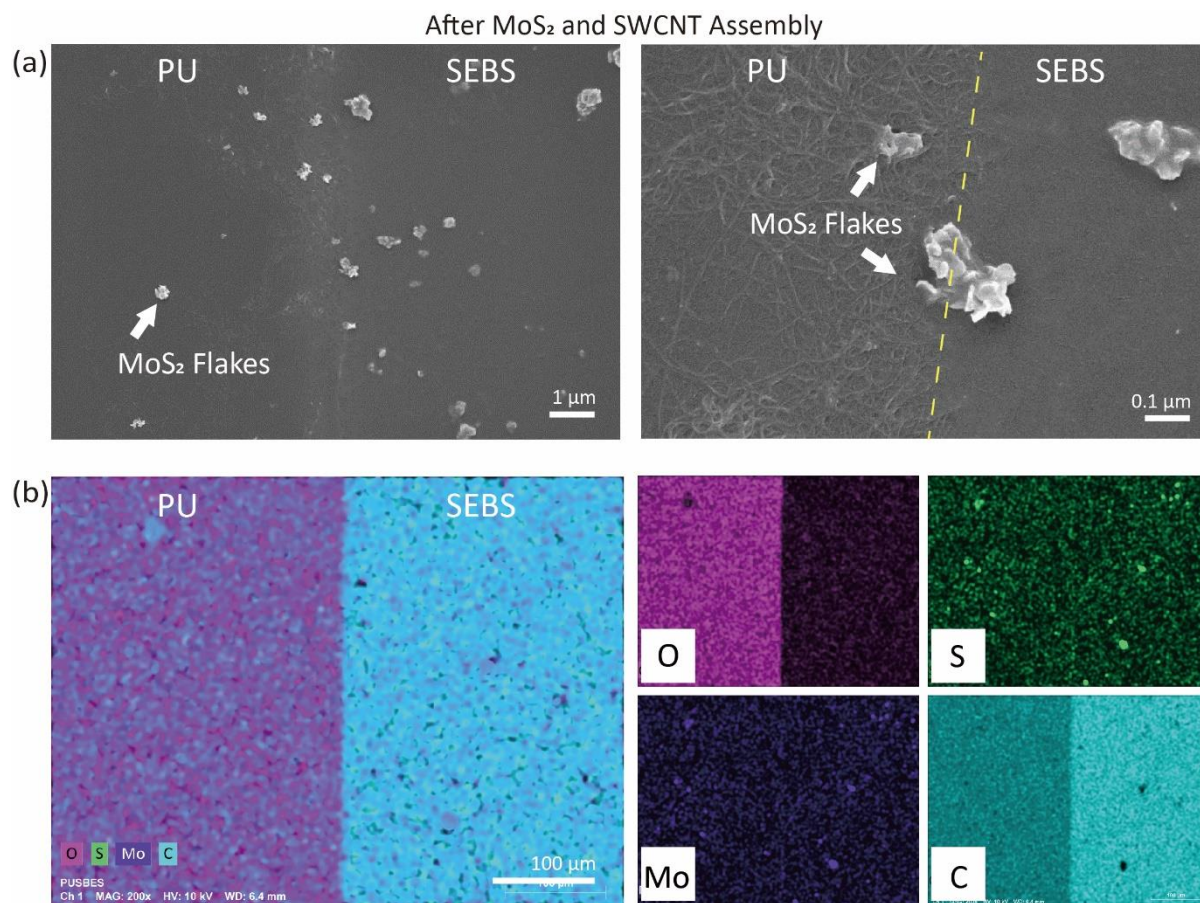

**Figure S1.** (a) SEM images of MoS<sub>2</sub>/SWCNT on PU and SEBS (b) EDS elemental mapping of MoS<sub>2</sub>/SWCNT O, S, Mo and C elements of PU and SEBS substrate.

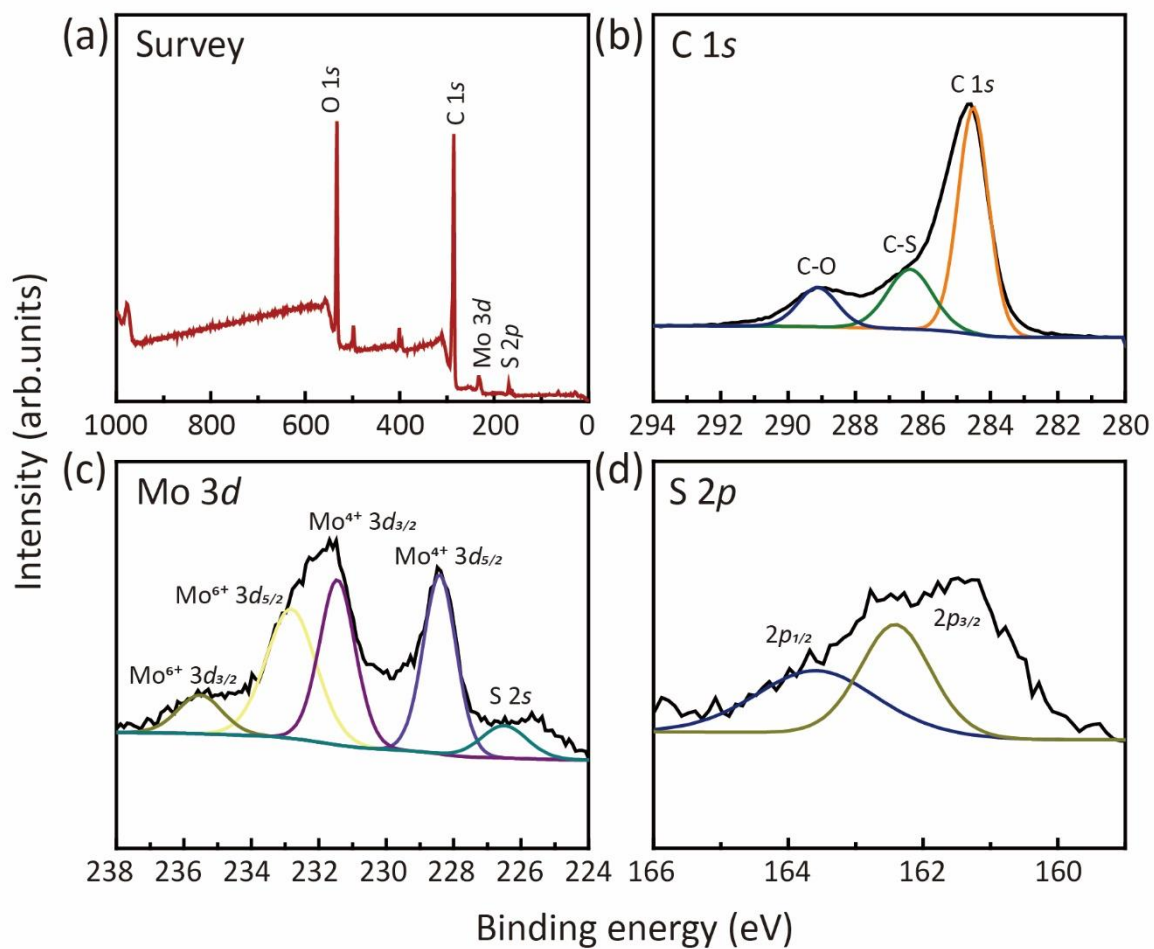

**Figure S2.** XPS spectra of MoS<sub>2</sub>/SWCNT (a) survey spectrum (b) C 1s (c) Mo 3d and (d) S 2p.

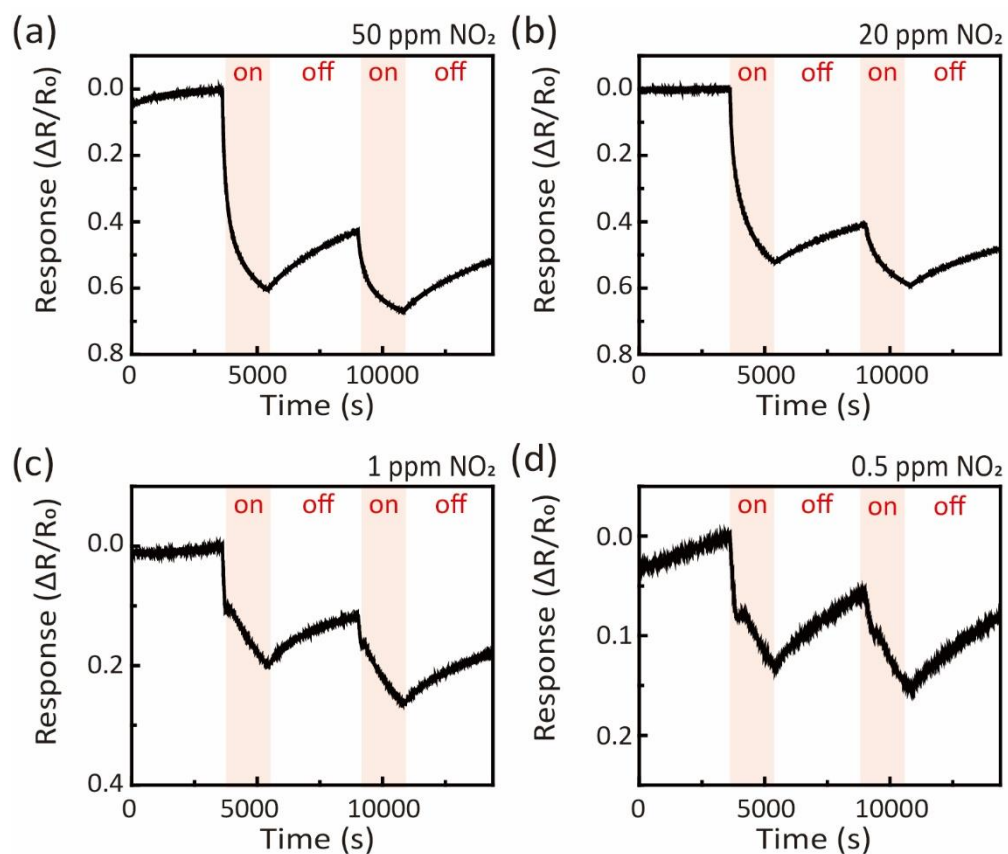

**Figure S3.** The response of NO<sub>2</sub> gas at room temperature (a) 50 ppm (b) 20 ppm (c) 1 ppm (d) 0.5 ppm.

References :

1. N. Kanaujiya, Anupam, K. Golimar, P. C. Pandey, Jyoti and G. Varma, 2018.
2. H. S. Hong, N. H. Phuong, N. T. Huong, N. H. Nam and N. T. Hue, Applied Surface Science, 2019, 492, 449-454.
